# Supplementary material
Source: PubMed Central journal article supplement (PMC3547474)
Supplement: cn3002174_si_001.pdf [file cn3002174_si_001.pdf]

# **Rethinking 5-HT<sub>1A</sub> Receptors: Emerging Modes of Inhibitory Feedback of Relevance to Emotion-Related Behavior**

<sup>1†</sup>Stefanie C. Altieri, <sup>4†</sup>Alvaro L. Garcia-Garcia, <sup>4\*</sup>E. David Leonardo, and

<sup>1,2,3\*</sup>Anne M. Andrews

*<sup>1</sup>Semel Institute for Neuroscience & Human Behavior, Hatos Center for Neuropharmacology, David Geffen School of Medicine, <sup>2</sup>Department of Chemistry and Biochemistry, and <sup>3</sup>California NanoSystems Institute, University of California, Los Angeles, CA 90095, USA*

*<sup>4</sup>Department of Psychiatry, Division of Integrative Neuroscience, Columbia University and New York State Psychiatric Institute, New York, NY 10032, USA*

†These authors contributed equally.

**SUPPORTING MATERIAL**

| PAPER                     | BACKGROUND STRAIN | AGE                               | GENDER                         | BEHAVIOR TEST      | PARAMETERS MEASURED                                              | RESULTS                             | OVERALL ASSESSMENT                                                                                                  |
|---------------------------|-------------------|-----------------------------------|--------------------------------|--------------------|------------------------------------------------------------------|-------------------------------------|---------------------------------------------------------------------------------------------------------------------|
| Heisler, L.K. et al. 1998 | C57BL/6           | 10-14 weeks                       | ♀ and ♂<br>(separate analysis) | Open Field         | time/entries/distance in center of arena                         | ↑ anxiety                           | ↑ ANXIETY<br>Anxiety more pronounced in males<br>Significant heterozygous effects in open field and tail suspension |
|                           |                   |                                   |                                | Elevated Zero Maze | time/entries/distance open area & head dips                      | ↑ anxiety<br>↓ exploratory behavior |                                                                                                                     |
|                           |                   |                                   |                                | Novel Object       | latency/distance/entrance to quadrant of novel object & rearings | ↑ anxiety                           |                                                                                                                     |
|                           |                   |                                   |                                | Tail Suspension    | immobility time                                                  | ↓ immobility                        |                                                                                                                     |
| Parks, C.L. et al. 1998   | Swiss Webster     | Adult (specific age not reported) | ♀ and ♂<br>(separate analysis) | Open Field         | crosses/time/entries in center                                   | ↑ anxiety                           | ↑ ANXIETY<br>Anxiety more pronounced in males                                                                       |
|                           |                   |                                   |                                | Forced Swim        | percent immobility                                               | ↓ immobility                        |                                                                                                                     |

| PAPER | BACKGROUND STRAIN | AGE | GENDER | BEHAVIOR TEST | PARAMETERS MEASURED | RESULTS | OVERALL ASSESSMENT |
|-------|-------------------|-----|--------|---------------|---------------------|---------|--------------------|
|-------|-------------------|-----|--------|---------------|---------------------|---------|--------------------|

|                          |                                    |                                      |                                |                            |                                                                         |                                                          |                                                   |
|--------------------------|------------------------------------|--------------------------------------|--------------------------------|----------------------------|-------------------------------------------------------------------------|----------------------------------------------------------|---------------------------------------------------|
| Ramboz, S. et al. 1998   | 129 Sv<br>CONSTITUTIVE<br>KNOCKOUT | Adult<br>(specific age not reported) | ♀ and ♂<br>(separate analysis) | Open Field                 | time/distance in center of arena, total distance, rearings & nose pokes | ↓ anxiety<br>↓ exploratory behavior & locomotor activity | ↑ ANXIETY<br><br>Anxiety more pronounced in males |
|                          |                                    |                                      |                                | Elevated Plus Maze         | time/entries into open arms, total arm entries, rearings & head dips    | ↑ anxiety ↓ head dips                                    |                                                   |
|                          |                                    |                                      |                                | Forced Swim                | percent immobility                                                      | ↓ immobility                                             |                                                   |
| Dulawa, S.C. et al. 2000 | 129 Sv<br>CONSTITUTIVE<br>KNOCKOUT | 16 18 weeks                          | ♀                              | Prepulse Inhibition        | Prepulse Inhibition                                                     | NC in PPI                                                | Normal Sensorimotor gating                        |
| Gross, C. et al. 2000    | 129 Sv<br>CONSTITUTIVE<br>KNOCKOUT | Adult<br>(specific age not reported) | ♀ and ♂<br>(combined analysis) | Novelty Suppressed Feeding | latency to feed following 24 h food deprivation                         | ↑ anxiety                                                | ↑ ANXIETY & FEAR RESPONSE                         |
|                          |                                    |                                      |                                | Foot Shock                 | percent freezing                                                        | ↑ freezing                                               |                                                   |

| PAPER | BACKGROUND STRAIN | AGE | GENDER | BEHAVIOR TEST | PARAMETERS MEASURED | RESULTS | OVERALL ASSESSMENT |
|-------|-------------------|-----|--------|---------------|---------------------|---------|--------------------|
|-------|-------------------|-----|--------|---------------|---------------------|---------|--------------------|

|                         |                                                                        |                                            |                                   |                                  |                                                                |                                                          |                                                               |
|-------------------------|------------------------------------------------------------------------|--------------------------------------------|-----------------------------------|----------------------------------|----------------------------------------------------------------|----------------------------------------------------------|---------------------------------------------------------------|
| Sarnyai, Z. et al. 2000 | Swiss Webster<br>CONSTITUTIVE<br>KNOCKOUT                              | Adult<br>(specific<br>age not<br>reported) | N.S.                              | Morris Water<br>Maze             | latency to reach hidden<br>platform/visible platform           | ↑ latency to reach<br>hidden but not visible<br>platform | ALTERED<br>HIPPOCAMPAL<br>DEPENDENT<br>LEARNING AND<br>MEMORY |
|                         |                                                                        |                                            |                                   | Y Maze                           | entries/time in each arm, first<br>choice novel arm            | No preference for novel<br>arms                          |                                                               |
|                         |                                                                        |                                            |                                   | Spontaneous<br>Alternation       | # arms entered and #<br>alternations between arms of Y<br>maze | NC in entries or<br>alternations                         |                                                               |
| Dirks, A. et al. 2001   | 129 Sv<br>CONSTITUTIVE<br>KNOCKOUT                                     | 8 14 weeks                                 | ♂                                 | Acoustic Startle<br>Reactivity   | startle magnitude                                              | NC in startle magnitude                                  | INTACT STARTLE<br>REACTIVITY                                  |
| Gross, C. et al. 2002   | mixed C57BL/6J,<br>CBA/J,<br>129S6/SvEvTac<br>CONSTITUTIVE<br>KNOCKOUT | 8 10 weeks                                 | ♀ and ♂<br>(combined<br>analysis) | Open Field                       | distance in center & total<br>distance in arena                | ↑anxiety ↓ locomotor<br>activity                         | ↑ ANXIETY                                                     |
|                         |                                                                        |                                            |                                   | Elevated Plus<br>Maze            | percent entries into open arms                                 | ↑anxiety                                                 |                                                               |
|                         |                                                                        |                                            |                                   | Novelty<br>Suppressed<br>Feeding | latency to feed following 24 h<br>food deprivation             | ↑anxiety                                                 |                                                               |

| PAPER | BACKGROUND STRAIN | AGE | GENDER | BEHAVIOR TEST | PARAMETERS MEASURED | RESULTS | OVERALL ASSESSMENT |
|-------|-------------------|-----|--------|---------------|---------------------|---------|--------------------|
|-------|-------------------|-----|--------|---------------|---------------------|---------|--------------------|

|                             |                                    |            |      |                         |                                                                                                                  |                                                                                                                |                                                                                                     |
|-----------------------------|------------------------------------|------------|------|-------------------------|------------------------------------------------------------------------------------------------------------------|----------------------------------------------------------------------------------------------------------------|-----------------------------------------------------------------------------------------------------|
| Pattij, T. et al. 2002      | 129 Sv<br>CONSTITUTIVE<br>KNOCKOUT | 8 weeks    | ♂    | Elevated Plus<br>Maze   | percent open arm time, # of<br>open arm entries                                                                  | NC in anxiety                                                                                                  | = ANXIETY                                                                                           |
| Pattij et al. 2002          | 129 Sv<br>CONSTITUTIVE<br>KNOCKOUT | 12 weeks   | ♂    | Novel<br>Environment    | locomotion, rearing, grooming,<br>exploration, stretched approach,<br>posture, immobility & burying<br>behaviors | ↓ time locomotion,<br>stretched approach,<br>rearing & burying<br>↓ # rearings, stretched<br>approach, burying | ↓ EXPLORATORY<br>ACTIVITY                                                                           |
| Groenink, L. et al.<br>2003 | 129 Sv<br>CONSTITUTIVE<br>KNOCKOUT | 8 12 weeks | N.S. | Open Field              | time/entries/distance in center<br>of arena, total distance                                                      | NC anxiety or locomotor<br>activity                                                                            | = ANXIETY<br><br>(explained as<br>potential ceiling effect<br>given increased<br>anxiety of strain) |
|                             |                                    |            |      | Light Dark Test         | distance/entries/percent time<br>in light compartment, total<br>distance                                         | NC anxiety                                                                                                     |                                                                                                     |
|                             |                                    |            |      | Elevated Plus<br>Maze   | distance/entries and percent<br>time in open arms, total<br>distance                                             | NC anxiety or locomotor<br>activity                                                                            |                                                                                                     |
|                             |                                    |            |      | Fear<br>Conditioning    | percent freezing                                                                                                 | NC freezing behavior                                                                                           |                                                                                                     |
| Pattij, T. et al.<br>2003   | 129 Sv<br>CONSTITUTIVE<br>KNOCKOUT | 8 weeks    | ♂    | Operant<br>Conditioning | autoshaping,<br>acquisition/reversal learning,<br>extinction                                                     | ↑ autoshaping, NC<br>acquisition/reversal<br>learning or extinction                                            | = REINFORCEMENT<br>LEARNING                                                                         |

| PAPER | BACKGROUND STRAIN | AGE | GENDER | BEHAVIOR TEST | PARAMETERS MEASURED | RESULTS | OVERALL ASSESSMENT |
|-------|-------------------|-----|--------|---------------|---------------------|---------|--------------------|
|-------|-------------------|-----|--------|---------------|---------------------|---------|--------------------|

|                                |                                 |                                   |                             |                    |                                                      |                                                                      |                                                                        |
|--------------------------------|---------------------------------|-----------------------------------|-----------------------------|--------------------|------------------------------------------------------|----------------------------------------------------------------------|------------------------------------------------------------------------|
| Bailey, S.J. et al. 2004       | Swiss Webster and C57BL/6       | 8 20 weeks                        | ♂                           | Elevated Plus Maze | percent time/entries in open arms, total arm entries | ↑ anxiety both strains                                               | ↑ ANXIETY & FEAR RESPONSE<br>↓ EXPLORATORY ACTIVITY (strain dependent) |
|                                | CONSTITUTIVE KNOCKOUT           |                                   |                             | Open Field         | percent time/entries in center of arena              | ↓ ↑ anxiety both strains<br>↓ locomotor activity in B6 only          |                                                                        |
| Wolff, M. et al. 2004          | 129 Sv<br>CONSTITUTIVE KNOCKOUT | 12 or 88 weeks                    | ♂                           | Morris Water Maze  | path length to reach hidden platform                 | ↑ path length to reach hidden platform on younger but not older mice | ALTERED AGE AND HIPPOCAMPAL DEPENDENT LEARNING AND MEMORY              |
| Jones, M.D. & Luck, i I. 2005  | 129 Sv<br>CONSTITUTIVE KNOCKOUT | 12 15 weeks                       | ♀ and ♂ (separate analysis) | Tail Suspension    | immobility time                                      | ↓ immobility                                                         | ↓ IMMOBILITY                                                           |
| Klemenhausen, K.C. et al. 2006 | 129 Sv<br>CONSTITUTIVE KNOCKOUT | Adult (specific age not reported) | ♂                           | Light Dark Test    | time in light compartment and # of ambulations       | ↑ anxiety<br>NC in locomotor activity                                | ↑ ANXIETY & FEAR RESPONSE                                              |
|                                |                                 |                                   |                             | Novel Object       | # of visits                                          | ↑ visits (session dependent)                                         |                                                                        |
|                                |                                 |                                   |                             | Fear Conditioning  | percent freezing                                     | ↑ freezing behavior                                                  |                                                                        |

| PAPER | BACKGROUND STRAIN | AGE | GENDER | BEHAVIOR TEST | PARAMETERS MEASURED | RESULTS | OVERALL ASSESSMENT |
|-------|-------------------|-----|--------|---------------|---------------------|---------|--------------------|
|-------|-------------------|-----|--------|---------------|---------------------|---------|--------------------|

|                                 |                                                               |                                   |                             |                     |                                              |                                                                 |                                     |
|---------------------------------|---------------------------------------------------------------|-----------------------------------|-----------------------------|---------------------|----------------------------------------------|-----------------------------------------------------------------|-------------------------------------|
| Tsetsenis T & Gross et al. 2007 | mixed C57BL/6J, CBA/J, 129S6/SvEvTac<br>CONSTITUTIVE KNOCKOUT | Adult (specific age not reported) | N.S.                        | Fear Conditioning   | percent freezing                             | ↑ freezing behavior (cue dependent)                             | ↑ FEAR RESPONSE                     |
| Bechtholt, A.J. et al. 2008     | 129 Sv<br>CONSTITUTIVE KNOCKOUT                               | 12 24 weeks                       | ♀ and ♂ (separate analysis) | Sucrose Consumption | Intake and preference for sucrose over water | ↑ consumption and preference in females only (1% concentration) | ↓ ANHEDONIA                         |
| Zanettini, C. et al. 2009       | mixed C57BL/6J, CBA/J, 129S6/SvEvTac<br>CONSTITUTIVE KNOCKOUT | 12 20 weeks                       | ♂                           | Open Field          | time in center of arena and total distance   | ↑ anxiety<br>↓ locomotor activity                               | ↑ ANXIETY &<br>↓ SOCIAL INTERACTION |
|                                 |                                                               |                                   |                             | Social Approach     | percent time in social side                  | ↓ social interaction                                            |                                     |
|                                 |                                                               |                                   |                             | Resident Intruder   | social interaction with intruder mouse       | NC in aggressive behavior                                       |                                     |

| PAPER                             | BACKGROUND STRAIN                                                        | AGE         | GENDER | BEHAVIOR TEST              | PARAMETERS MEASURED                                                           | RESULTS                                               | OVERALL ASSESSMENT                                                             |
|-----------------------------------|--------------------------------------------------------------------------|-------------|--------|----------------------------|-------------------------------------------------------------------------------|-------------------------------------------------------|--------------------------------------------------------------------------------|
| Richardson Jones J.W. et al. 2010 | mixed C57Bl/6J, CBA/J, 129S6/SvEvTac<br><br>POPULATION SPECIFIC KNOCKOUT | 11 13 weeks | ♂      | Open Field                 | time in center of arena and total distance                                    | NC in anxiety or locomotor activity                   | = ANXIETY IN MICE WITH ~30% REDUCTIONS IN 5 HT1A AUTORECEPTORS                 |
|                                   |                                                                          |             |        | Light Dark Test            | time in light compartment and total distance                                  | NC in anxiety or locomotor activity                   |                                                                                |
|                                   |                                                                          |             |        | Forced Swim                | percent mobility                                                              | ↑ mobility during last minute (Trial 2)               |                                                                                |
|                                   |                                                                          |             |        | Tail Suspension            | percent mobility                                                              | NC in mobility                                        |                                                                                |
|                                   |                                                                          |             |        | Novelty Suppressed Feeding | latency to feed following 24 h food deprivation and in presence of fluoxetine | ↓ latency to feed following fluoxetine administration |                                                                                |
| Richardson Jones, J.W.et al. 2011 | mixed C57BL/6J, CBA/J, 129S6/SvEvTac<br><br>POPULATION SPECIFIC KNOCKOUT | 11 13 weeks | ♂      | Open Field                 | percent center distance and total distance                                    | ↑ anxiety in auto KO                                  | ↑ ANXIETY ONLY INAUTORECEPTOR KO<br><br>↑ IMMOBILITY ONLY IN HETERORECEPTOR KO |
|                                   |                                                                          |             |        | Light Dark Test            | percent distance/entries in light compartment and total distance              | ↑ anxiety and locomotor activity in auto KO           |                                                                                |
|                                   |                                                                          |             |        | Forced Swim                | percent mobility                                                              | ↓ mobility in hetero KO                               |                                                                                |



| PAPER                      | BACKGROUND STRAIN                     | AGE         | GENDER | BEHAVIOR TEST      | PARAMETERS MEASURED                 | RESULTS                                | OVERALL ASSESSMENT                                                                                                            |
|----------------------------|---------------------------------------|-------------|--------|--------------------|-------------------------------------|----------------------------------------|-------------------------------------------------------------------------------------------------------------------------------|
| Bortolozzi, A. et al. 2012 | C57BL/6<br>POPULATION SPECIFIC MODELS | 10 15 weeks | ♂      | Elevated Plus Maze | percent time/entries into open arms | ↑ anxiety in KO restored in C-1A siRNA | ↑ ANXIETY IN KO THAT IS RESTORED IN MICE WHERE C 1A siRNA IS INFUSED INTO THE DORSAL RAPHE<br><br>↓ IMMOBILITY IN BOTH MODELS |
|                            |                                       |             |        | Tail Suspension    | immobility time                     | ↓ immobility in KO and C               |                                                                                                                               |
|                            |                                       |             |        | Forced Swim        | immobility time                     | ↓ immobility in C                      |                                                                                                                               |
| Ferres Coy, A. et al. 2012 | C57BL/6<br>POPULATION SPECIFIC MODELS | 9 12 weeks  | ♂      | Elevated Plus Maze | percent time/entries into open arms | ↑ anxiety in KO restored in C-1A siRNA | ↑ ANXIETY IN KO THAT IS RESTORED IN MICE WHERE C 1A siRNA IS INFUSED INTO THE DORSAL RAPHE<br><br>↓ IMMOBILITY IN BOTH MODELS |
|                            |                                       |             |        | Tail Suspension    | immobility time                     | ↓ immobility in KO and C               |                                                                                                                               |
|                            |                                       |             |        | Forced Swim        | immobility time                     | ↓ immobility in C                      |                                                                                                                               |

| PAPER                         | BACKGROUND STRAIN                                                | AGE          | GENDER                         | BEHAVIOR TEST              | PARAMETERS MEASURED                                                       | RESULTS                                        | OVERALL ASSESSMENT                                                                                                   |
|-------------------------------|------------------------------------------------------------------|--------------|--------------------------------|----------------------------|---------------------------------------------------------------------------|------------------------------------------------|----------------------------------------------------------------------------------------------------------------------|
| Iacono, L.L. & Gross, C. 2008 | mixed C57BL/6J, CBA/J, 129S6/SvEvTac<br>PHARMACOLOGIC INHIBITION | 14 16 weeks  | ♂                              | Open Field                 | time/distance in center & total distance in arena                         | ↑ anxiety                                      | ↑ ANXIETY IN WILDTYPE MICE TREATED WAY100635 VIA OSMOTIC MINIPUMP FROM P13 P34<br><br>(0.15 mg/h per kg body weight) |
|                               |                                                                  |              |                                | Elevated Plus Maze         | time/entries into open arms                                               | = anxiety                                      |                                                                                                                      |
|                               |                                                                  |              |                                | Novelty Suppressed Feeding | latency to feed following 24 h food deprivation                           | ↑ anxiety                                      |                                                                                                                      |
| Vinkers, C.H. et al. 2010     | Swiss Webster<br>PHARMACOLOGIC INHIBITION                        | P7, P12, P21 | ♂                              | Elevated Plus Maze         | percent open arm entries & total arm entries                              | ↑ anxiety                                      | ↑ ANXIETY AND USVs IN 5 HT1A KO MICE AND MICE TREATED WITH WAY100365 FROM P0 P21                                     |
|                               |                                                                  |              |                                | Open Field                 | # entries, percent distance and time spent in center of arena             | ↑ anxiety and<br>↓ locomotor activity          |                                                                                                                      |
|                               |                                                                  |              |                                | Ultrasonic Vocalizations   | # of ultrasonic vocalizations (USVs)                                      | ↑ USVs                                         |                                                                                                                      |
| Kusserow, H. et al. 2004      | NMRI outbred<br>OVEREXPRESSION                                   | 15 22 weeks  | ♀ and ♂<br>(separate analysis) | Elevated Plus Maze         | time/entries in open/closed arms, total arm entries, rearings & head dips | ↓ anxiety and<br>↑ locomotor activity          | ↓ ANXIETY &<br>↑ LOCOMOTOR ACTIVITY                                                                                  |
|                               |                                                                  |              |                                | Open Field                 | entries/time spent in center of arena, total distance & rearings          | ↑ locomotor activity (male only) and = anxiety |                                                                                                                      |

| PAPER                   | BACKGROUND STRAIN              | AGE         | GENDER                         | BEHAVIOR TEST                   | PARAMETERS MEASURED                                                               | RESULTS                                              | OVERALL ASSESSMENT                                                                                                          |
|-------------------------|--------------------------------|-------------|--------------------------------|---------------------------------|-----------------------------------------------------------------------------------|------------------------------------------------------|-----------------------------------------------------------------------------------------------------------------------------|
| Bert, B. et al. 2005    | NMRI outbred<br>OVEREXPRESSION | 12 13 weeks | ♀ and ♂<br>(separate analysis) | Hole Board<br>Morris Water Maze | # nose pokes & distance traveled<br>latency & path length to find hidden platform | NC in spatial habituation<br>↑ latency & path length | ALTERED HIPPOCAMPAL DEPENDENT LEARNING AND MEMORY<br><br>IN MICE WITH TRANSIENT OVEREXPRESSION                              |
| Bert, B. et al. 2006    | NMRI outbred<br>OVEREXPRESSION | 18 weeks    | ♀ and ♂<br>(separate analysis) | Open Field                      | rearings & total distance in arena                                                | ↓ locomotor activity & exploration                   | = ANXIETY & ↓ LOCOMOTOR AND EXPLORATORY BEHAVIORS IN MICE PERMANENTLY OVEREXPRESSION<br><br>Changes more prominent in males |
|                         |                                |             |                                | Elevated Plus Maze              | time/entries into open arms, closed/total arm entries, rearings & head dips       | = anxiety and locomotor activity                     |                                                                                                                             |
| Gunther, L. et al. 2011 | NMRI outbred<br>OVEREXPRESSION | 12 14 weeks | ♀ and ♂<br>(separate analysis) | Forced Swim                     | Immobility Time                                                                   | ↓ immobility                                         | ↓ IMMOBILITY                                                                                                                |

**Supplemental Table 1.** Behavior phenotypes of animal models of altered 5-HT<sub>1A</sub> receptor expression. Information pertaining to models of 5-HT<sub>1A</sub> knockout, overexpression, and pharmacological inhibition is summarized. The outcome of these manipulations on tests of emotion-related behavior, including anxiety and depression parameters, as well as learning and memory, is detailed.

## References

1. Heisler, L. K., Chu, H. M., Brennan, T. J., Danao, J. A., Bajwa, P., Parsons, L. H., and Tecott, L. H. (1998) Elevated anxiety and antidepressant-like responses in serotonin 5-HT<sub>1A</sub> receptor mutant mice, *Proc Natl Acad Sci* 95, 15049-15054.
2. Parks, C. L., Robinson, P. S., Sibille, E., Shenk, T., and Toth, M. (1998) Increased anxiety of mice lacking the serotonin<sub>1A</sub> receptor, *Proc Natl Acad Sci* 95, 10734-10739.
3. Ramboz, S., Oosting, R., Amara, D. A., Kung, H. F., Blier, P., Mendelsohn, M., Mann, J. J., Brunner, D., and Hen, R. (1998) Serotonin receptor 1A knockout: An animal model of anxiety-related disorder, *Proc Natl Acad Sci* 95, 14476-14481.
4. Dulawa, S. C., Gross, C., Stark, K. L., Hen, R., and Geyer, M. A. (2000) Knockout mice reveal opposite roles for serotonin 1A and 1B receptors in prepulse inhibition, *Neuropsychopharmacology* 22, 650-659.
5. Gross, C., Santarelli, L., Brunner, D., Zhuang, X., and Hen, R. (2000) Altered fear circuits in 5-HT<sub>1A</sub> receptor KO mice, *Biol Psychiatry* 48, 1157-1163.
6. Sarnyai, Z., Sibille, E. L., Pavlides, C., Fenster, R. J., McEwen, B. S., and Toth, M. (2000) Impaired hippocampal-dependent learning and functional abnormalities in the hippocampus in mice lacking serotonin<sub>1A</sub> receptors, *Proc Natl Acad Sci* 97, 14731-14736.
7. Dirks, A., Pattij, T., Bouwknecht, J. A., Westphal, T. T., Hijzen, T. H., Groenink, L., van der Gugten, J., Oosting, R. S., Hen, R., Geyer, M. A., and Olivier, B. (2001) 5-HT<sub>1B</sub> receptor knockout, but not 5-HT<sub>1A</sub> receptor knockout mice, show reduced startle reactivity and footshock-induced sensitization, as measured with the acoustic startle response, *Behav Brain Res* 118, 169-178.
8. Gross, C., Zhuang, X., Stark, K., Ramboz, S., Oosting, R., Kirby, L., Santarelli, L., Beck, S., and Hen, R. (2002) Serotonin<sub>1A</sub> receptor acts during development to establish normal anxiety-like behaviour in the adult, *Nature* 416, 396-400.

9. Pattij, T., Broersen, L. M., van der Linde, J., Groenink, L., van der Gugten, J., Maes, R. A., and Olivier, B. (2003) Operant learning and differential-reinforcement-of-low-rate 36-s responding in 5-HT<sub>1A</sub> and 5-HT<sub>1B</sub> receptor knockout mice, *Behav Brain Res* 141, 137-145.
10. Pattij, T., Groenink, L., Hijzen, T. H., Oosting, R. S., Maes, R. A., van der Gugten, J., and Olivier, B. (2002) Autonomic changes associated with enhanced anxiety in 5-HT<sub>1A</sub> receptor knockout mice, *Neuropsychopharmacology* 27, 380-390.
11. Pattij, T., Groenink, L., Oosting, R. S., van der Gugten, J., Maes, R. A., and Olivier, B. (2002) GABA(A)-benzodiazepine receptor complex sensitivity in 5-HT<sub>1A</sub> receptor knockout mice on a 129/Sv background, *Eur J Pharmacol* 447, 67-74.
12. Groenink, L., van Bogaert, M. J., van der Gugten, J., Oosting, R. S., and Olivier, B. (2003) 5-HT<sub>1A</sub> receptor and 5-HT<sub>1B</sub> receptor knockout mice in stress and anxiety paradigms, *Behav Pharmacol* 14, 369-383.
13. Bailey, S. J., and Toth, M. (2004) Variability in the benzodiazepine response of serotonin 5-HT<sub>1A</sub> receptor null mice displaying anxiety-like phenotype: evidence for genetic modifiers in the 5-HT-mediated regulation of GABA(A) receptors, *J Neurosci* 24, 6343-6351.
14. Wolff, M., Costet, P., Gross, C., Hen, R., Segu, L., and Buhot, M. C. (2004) Age-dependent effects of serotonin-1A receptor gene deletion in spatial learning abilities in mice, *Brain Res Mol Brain Res* 130, 39-48.
15. Jones, M. D., and Lucki, I. (2005) Sex differences in the regulation of serotonergic transmission and behavior in 5-HT receptor knockout mice, *Neuropsychopharmacology* 30, 1039-1047.
16. Klemenhagen, K. C., Gordon, J. A., David, D. J., Hen, R., and Gross, C. T. (2006) Increased fear response to contextual cues in mice lacking the 5-HT<sub>1A</sub> receptor, *Neuropsychopharmacology* 31, 101-111.
17. Tsetsenis, T., Ma, X. H., Lo Iacono, L., Beck, S. G., and Gross, C. (2007) Suppression of conditioning to ambiguous cues by pharmacogenetic inhibition of the dentate gyrus, *Nat Neurosci* 10, 896-902.

18. Bechtholt, A. J., Smith, K., Gaughan, S., and Lucki, I. (2008) Sucrose intake and fasting glucose levels in 5-HT(1A) and 5-HT(1B) receptor mutant mice, *Physiol Behav* 93, 659-665.
19. Zanettini, C., Carola, V., Lo Iacono, L., Moles, A., Gross, C., and D'Amato, F. R. (2010) Postnatal handling reverses social anxiety in serotonin receptor 1A knockout mice, *Genes Brain Behav* 9, 26-32.
20. Richardson-Jones, J. W., Craige, C. P., Guiard, B. P., Stephen, A., Metzger, K. L., Kung, H. F., Gardier, A. M., Dranovsky, A., David, D. J., Beck, S. G., Hen, R., and Leonardo, E. D. (2010) 5-HT<sub>1A</sub> autoreceptor levels determine vulnerability to stress and response to antidepressants, *Neuron* 65, 40-52.
21. Richardson-Jones, J. W., Craige, C. P., Nguyen, T. H., Kung, H. F., Gardier, A. M., Dranovsky, A., David, D. J., Guiard, B. P., Beck, S. G., Hen, R., and Leonardo, E. D. (2011) Serotonin-1A autoreceptors are necessary and sufficient for the normal formation of circuits underlying innate anxiety, *J Neurosci* 31, 6008-6018.
22. Bortolozzi, A., Castane, A., Semakova, J., Santana, N., Alvarado, G., Cortes, R., Ferres-Coy, A., Fernandez, G., Carmona, M. C., Toth, M., Perales, J. C., Montefeltro, A., and Artigas, F. (2012) Selective siRNA-mediated suppression of 5-HT<sub>1A</sub> autoreceptors evokes strong anti-depressant-like effects, *Mol Psychiatry* 17, 612-623.
23. Ferres-Coy, A., Santana, N., Castane, A., Cortes, R., Carmona, M. C., Toth, M., Montefeltro, A., Artigas, F., and Bortolozzi, A. (2012) Acute 5-HT(1A) autoreceptor knockdown increases antidepressant responses and serotonin release in stressful conditions, *Psychopharmacology (Berl)*.
24. Lo Iacono, L., and Gross, C. (2008) Alpha-Ca<sup>2+</sup>/calmodulin-dependent protein kinase II contributes to the developmental programming of anxiety in serotonin receptor 1A knock-out mice, *J Neurosci* 28, 6250-6257.
25. Vinkers, C. H., Oosting, R. S., van Bogaert, M. J., Olivier, B., and Groenink, L. (2010) Early-life blockade of 5-HT(1A) receptors alters adult anxiety behavior and benzodiazepine sensitivity, *Biol Psychiatry* 67, 309-316.

26. Bert, B., Dere, E., Wilhelmi, N., Kusserow, H., Theuring, F., Huston, J. P., and Fink, H. (2005) Transient overexpression of the 5-HT<sub>1A</sub> receptor impairs water-maze but not hole-board performance, *Neurobiol Learn Mem* 84, 57-68.
27. Bert, B., Fink, H., Hortnagl, H., Veh, R. W., Davies, B., Theuring, F., and Kusserow, H. (2006) Mice over-expressing the 5-HT<sub>1A</sub> receptor in cortex and dentate gyrus display exaggerated locomotor and hypothermic response to 8-OH-DPAT, *Behav Brain Res* 167, 328-341.
28. Kusserow, H., Davies, B., Hortnagl, H., Voigt, I., Stroh, T., Bert, B., Deng, D. R., Fink, H., Veh, R. W., and Theuring, F. (2004) Reduced anxiety-related behaviour in transgenic mice overexpressing serotonin 1A receptors, *Brain Res Mol Brain Res* 129, 104-116.
29. Gunther, L., Rothe, J., Rex, A., Voigt, J. P., Millan, M. J., Fink, H., and Bert, B. (2011) 5-HT<sub>1A</sub>-receptor over-expressing mice: genotype and sex dependent responses to antidepressants in the forced swim-test, *Neuropharmacology* 61, 433-441.
